# Supplementary material for: Association Between Adrenal-Restrictive HSD3B1 Inheritance and Hormone-Independent Subtypes of Endometrial and Breast Cancer
Source: PubMed Central journal article supplement — JNCI Cancer Spectr. 2022 Aug 10;6(5):pkac061. doi: 10.1093/jncics/pkac061 (PMC9475354; doi:10.1093/jncics/pkac061), 2022-08-10
Supplement: pkac061_supplementary_data.pdf [file pkac061_supplementary_data.pdf]

## Supplementary Materials

**Supplementary Table 1. Demographic information for TCGA-UCEC and TCGA-BRCA cohorts using self-reported race.**

| Characteristic                                  | TCGA-UCEC (endometrial cancer)    |                                                | TCGA-BRCA (breast cancer) – female patients |                                                |
|-------------------------------------------------|-----------------------------------|------------------------------------------------|---------------------------------------------|------------------------------------------------|
|                                                 | All genotyped patients<br>No. (%) | Patients with subtype<br>classified<br>No. (%) | All genotyped patients<br>No. (%)           | Patients with subtype<br>classified<br>No. (%) |
| <b>Self-reported race</b>                       |                                   |                                                |                                             |                                                |
| American Indian<br>or Alaska Native             | 3 (0.5)                           | 3 (0.6)                                        | 1 (0.1)                                     | 1 (0.1)                                        |
| Asian                                           | 20 (3.7)                          | 20 (4.0)                                       | 59 (5.6)                                    | 58 (6.1)                                       |
| Black                                           | 108 (19.8)                        | 101 (20.0)                                     | 173 (16.5)                                  | 152 (16.0)                                     |
| Native Hawaiian<br>or other Pacific<br>Islander | 9 (1.6)                           | 9 (1.8)                                        | --                                          | --                                             |
| White                                           | 374 (68.5)                        | 342 (67.6)                                     | 725 (69.1)                                  | 657 (69.2)                                     |
| Not available                                   | 32 (5.9)                          | 31 (6.1)                                       | 91 (8.7)                                    | 81 (8.5)                                       |
| <b>Total number of<br/>patients</b>             | 546                               | 506                                            | 1,049                                       | 949                                            |
| <b>Age – mean (range)</b>                       | 63.9 (31-90)                      | 63.8 (31-90)                                   | 58.4 (26-90)                                | 58.2 (31-90)                                   |

**Supplementary Table 2. Demographic information and genetic ancestry breakdowns by genomic subtype for TCGA-UCEC patients with subtype classified.<sup>a</sup>**

| Characteristic                            | CN-high<br>No. (%) | CN-low<br>No. (%) | MSI<br>No. (%) | POLE<br>No. (%) |
|-------------------------------------------|--------------------|-------------------|----------------|-----------------|
| Self-reported race                        |                    |                   |                |                 |
| American Indian or Alaska Native          | 1 (0.6)            | 1 (0.7)           | 1 (0.7)        | 0 (0.0)         |
| Asian                                     | 2 (1.2)            | 7 (4.8)           | 6 (4.1)        | 5 (10.2)        |
| Black                                     | 51 (31.3)          | 19 (12.9)         | 23 (15.6)      | 8 (16.3)        |
| Native Hawaiian or other Pacific Islander | 3 (1.8)            | 2 (1.4)           | 2 (1.4)        | 2 (4.1)         |
| White                                     | 93 (57.1)          | 115 (78.2)        | 108 (73.5)     | 26 (53.1)       |
| Not available                             | 13 (8.0)           | 3 (2.0)           | 7 (4.8)        | 8 (16.3)        |
| Genetic ancestry                          |                    |                   |                |                 |
| African                                   | 52 (31.9)          | 21 (14.3)         | 25 (17.0)      | 9 (18.4)        |
| East Asian                                | 4 (2.5)            | 8 (5.4)           | 9 (6.1)        | 8 (16.3)        |
| European                                  | 102 (62.6)         | 114 (77.6)        | 111 (75.5)     | 29 (59.2)       |
| Native American                           | 4 (2.5)            | 3 (2.0)           | 2 (1.4)        | 3 (6.1)         |
| Other                                     | 1 (0.6)            | 1 (0.7)           | 0 (0.0)        | 0 (0.0)         |
| Age: mean (range)                         | 68.7 (33-87)       | 61.6 (31-90)      | 63.0 (35-88)   | 56.0 (33-87)    |

<sup>a</sup>CN: copy number; MSI: microsatellite instability hypermutated; POLE: *POLE* hypermutated

**Supplementary Table 3. Demographic information and genetic ancestry breakdowns by genomic subtype for TCGA-BRCA patients with subtype classified.**

| Characteristic                      | Basal<br>No. (%) | Her2<br>enriched<br>No. (%) | Luminal A<br>No. (%) | Luminal B<br>No. (%) | Normal<br>No. (%) |
|-------------------------------------|------------------|-----------------------------|----------------------|----------------------|-------------------|
| <b>Self-reported race</b>           |                  |                             |                      |                      |                   |
| American Indian or<br>Alaska Native | 0 (0.0)          | 1 (1.3)                     | 0 (0.0)              | 0 (0.0)              | 0 (0.0)           |
| Asian                               | 7 (4.3)          | 14 (18.4)                   | 20 (4.1)             | 16 (8.5)             | 1 (2.8)           |
| Black                               | 49 (30.4)        | 15 (19.7)                   | 56 (11.5)            | 23 (12.2)            | 9 (25.0)          |
| White                               | 100 (62.1)       | 36 (47.4)                   | 375 (77.0)           | 121 (64.0)           | 25 (69.4)         |
| Not available                       | 5 (3.1)          | 10 (13.2)                   | 36 (7.4)             | 29 (15.3)            | 1 (2.8)           |
| <b>Genetic ancestry</b>             |                  |                             |                      |                      |                   |
| African                             | 50 (31.1)        | 14 (18.4)                   | 56 (11.5)            | 24 (12.7)            | 9 (25.0)          |
| East Asian                          | 7 (4.3)          | 14 (18.4)                   | 17 (3.5)             | 16 (8.5)             | 1 (2.8)           |
| European                            | 101 (62.7)       | 45 (59.2)                   | 396 (81.3)           | 147 (77.8)           | 24 (66.7)         |
| Native American                     | 3 (1.9)          | 2 (2.6)                     | 12 (2.5)             | 2 (1.1)              | 2 (5.6)           |
| Other                               | 0 (0.0)          | 1 (1.3)                     | 6 (1.2)              | 0 (0.0)              | 0 (0.0)           |
| Age: mean (range)                   | 55.9 (29-90)     | 58.6 (32-90)                | 59.1 (26-90)         | 58.6 (27-90)         | 55.1 (35-90)      |

**Supplementary Table 4. TCGA-UCEC Clinicopathological characteristics by *HSD3B1* genotype for samples from subjects of African ancestry.**

| Variable                         | Genotype | No. (%)   | p-value                              |
|----------------------------------|----------|-----------|--------------------------------------|
| Stage                            |          |           |                                      |
| I                                | AA       | 53 (85.5) | 0.46                                 |
|                                  | AC       | 8 (12.9)  |                                      |
|                                  | CC       | 1 (1.6)   |                                      |
| ≥ II                             | AA       | 44 (84.6) |                                      |
|                                  | AC       | 6 (11.5)  |                                      |
|                                  | CC       | 2 (3.9)   |                                      |
| Histologic diagnosis             |          |           |                                      |
| Endometrioid                     | AA       | 62 (84.9) | 0.87<br>(serous vs.<br>endometrioid) |
|                                  | AC       | 8 (11.0)  |                                      |
|                                  | CC       | 3 (4.1)   |                                      |
| Mixed serous and<br>endometrioid | AA       | 7 (100.0) |                                      |
|                                  | AC       | 0 (0.0)   |                                      |
|                                  | CC       | 0 (0.0)   |                                      |
| Serous                           | AA       | 28 (82.4) |                                      |
|                                  | AC       | 6 (17.6)  |                                      |
|                                  | CC       | 0 (0.0)   |                                      |
| Grade (endometrioid only)        |          |           |                                      |
| 1 or 2                           | AA       | 34 (82.9) | 0.31                                 |
|                                  | AC       | 4 (9.8)   |                                      |
|                                  | CC       | 3 (7.3)   |                                      |
| 3                                | AA       | 28 (87.5) |                                      |
|                                  | AC       | 4 (12.5)  |                                      |
|                                  | CC       | 0 (0.0)   |                                      |

**Supplementary Table 5. Summary information for the TCGA-OV ovarian cancer cohort.**

| Characteristic           | All genotyped patients<br>No. (%) |
|--------------------------|-----------------------------------|
| Genetic ancestry         |                                   |
| African                  | 32 (7.4)                          |
| East Asian               | 10 (2.3)                          |
| European                 | 367 (84.8)                        |
| Native American          | 10 (2.3)                          |
| Other                    | 7 (1.6)                           |
| Not classified           | 7 (1.6)                           |
| Total number of patients | 433                               |
| Age – mean (range)       | 59.6 (26-89)                      |

**Supplementary Table 6. Breakdown of TCGA-OV samples by subtype and *HSD3B1* genotype.**

| Subtype <sup>a</sup>  | Genotype | All TCGA-OV<br>No. (%) | European ancestry<br>No. (%) |
|-----------------------|----------|------------------------|------------------------------|
| low-grade<br>serous   | AA       | 31 (55.4)              | 24 (51.1)                    |
|                       | AC       | 21 (37.5)              | 19 (40.4)                    |
|                       | CC       | 4 (7.1)                | 4 (8.5)                      |
| high-grade<br>serous  | AA       | 171 (47.0)             | 138 (44.5)                   |
|                       | AC       | 168 (46.2)             | 149 (48.1)                   |
|                       | CC       | 25 (6.9)               | 23 (7.4)                     |
| serous (any<br>grade) | AA       | 210 (48.5)             | 168 (45.8)                   |
|                       | AC       | 194 (44.8)             | 172 (46.9)                   |
|                       | CC       | 29 (6.7)               | 27 (7.4)                     |

<sup>a</sup>Grade 1 or 2 was considered low-grade and grade 3 was considered high grade. Note that the numbers for serous (any grade) are not the exact sums of low-grade plus high-grade due to some samples lacking grade classification.

**Supplementary Table 7. Results from testing of proportional hazards assumptions<sup>a</sup> for Cox regression models for survival of UK Biobank subjects with endometrial cancer diagnoses.**

| outcome                   | regression model                                                        | p-value for genotype variable | global p-value |
|---------------------------|-------------------------------------------------------------------------|-------------------------------|----------------|
| all-cause mortality       | univariate regression against genotype                                  | 0.38                          | 0.38           |
|                           | genotype + diagnosis age + BMI                                          | 0.32                          | 0.19           |
|                           | genotype + diagnosis age + BMI + first ten genetic principal components | 0.33                          | 0.54           |
| cancer-specific mortality | univariate regression against genotype                                  | 0.31                          | 0.31           |
|                           | genotype + diagnosis age + BMI                                          | 0.28                          | 0.40           |
|                           | genotype + diagnosis age + BMI + first ten genetic principal components | 0.29                          | 0.71           |

<sup>a</sup>Testing of proportional hazards assumptions was performed using the `cox.zph` function of R package `survival`. BMI: body mass index

**A** TCGA endometrial cancer: CN-high subtype vs. others

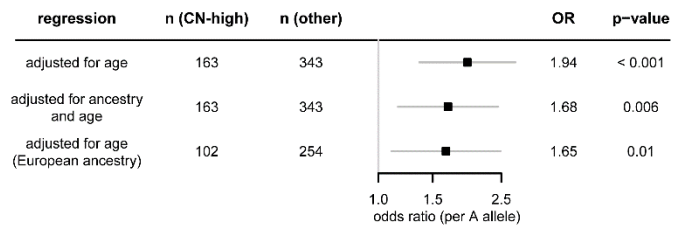

**B** TCGA breast cancer: basal subtype vs. others

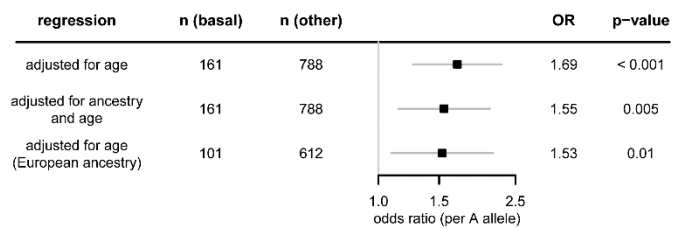

**Supplementary Figure 1. Adrenal-restrictive *HSD3B1* genotype is associated with hormone independent subtypes of endometrial and breast cancer in age-adjusted models.** Odds ratios (per A allele) with 95% confidence intervals for having (A) CN-high endometrial cancer vs. other genomic subtypes of endometrial cancer and (B) basal breast cancer vs. other genomic subtypes of breast cancer among subjects in the TCGA-UCEC and TCGA-BRCA projects, respectively, whose tumors had genomic subtype classified. Results are shown from binomial logistic regressions: a regression of (subtype = CN-high/basal) against number of A alleles adjusted for diagnosis age, a regression adjusted for genetic ancestry classification and diagnosis age, and a regression adjusted for diagnosis age and restricted to subjects classified as having European ancestry.



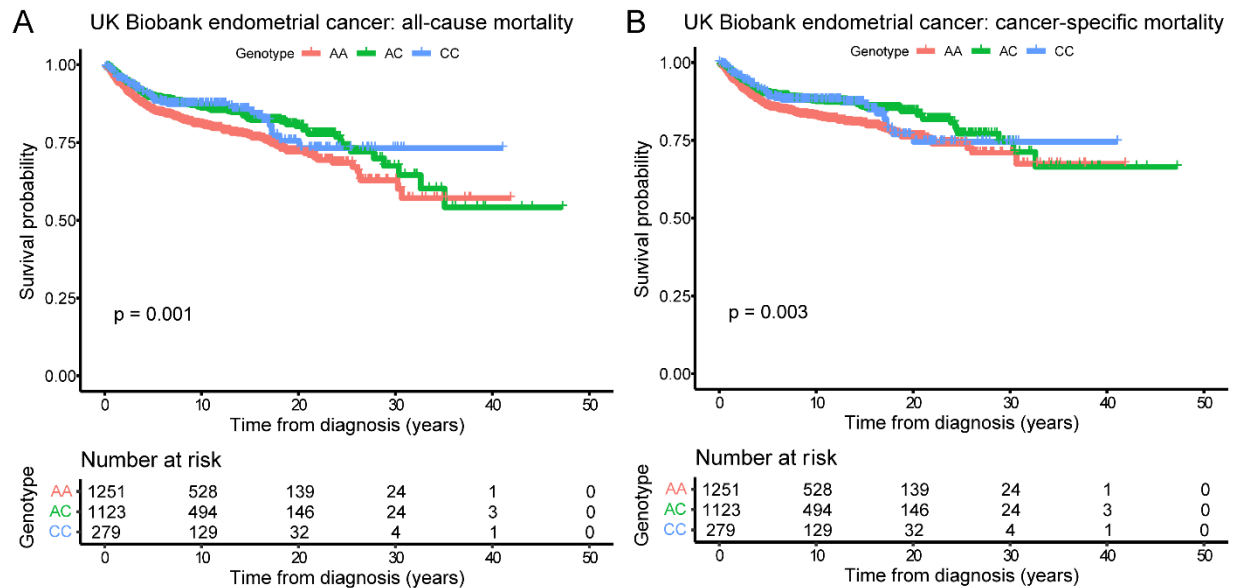

**Supplementary Figure 2. Homozygous adrenal-restrictive *HSD3B1* genotype is associated with worse endometrial cancer outcomes.** Kaplan-Meier curves of (A) all-cause mortality and (B) cancer-specific mortality for UK Biobank subjects who were diagnosed with endometrial cancer. Endometrial cancer patients were identified using the UK Biobank’s cancer registry with additional diagnosed patients identified using inpatient hospital records (ICD10 code C54.1). Diagnosis dates were extracted from the cancer registry for patients in the cancer registry, and from the earliest inpatient hospital record with ICD10 code C54.1 for patients not in the cancer registry. The UK Biobank’s death register was used to determine which patients died, along with causes and dates of death. P-values from log-rank tests are shown.
